# Supplementary material for: Cardiac contractile dysfunction in insulin-resistant rats fed a high-fat diet is associated with elevated CD36-mediated fatty acid uptake and esterification
Source: Springer Nature journal article supplement (doi:10.1007/s00125-007-0735-8), 2007-07-17
Supplement: MOESM1 [file 8087086]

## Electronic supplementary material

**ESM Table 1.** Heart rate and blood pressure of rats after 10 weeks on an HFD or a LFD

|                               | LFD            | HFD            |
|-------------------------------|----------------|----------------|
|                               | ( <i>n</i> =4) | ( <i>n</i> =6) |
| Heart rate (beats per min)    | 331±4          | 342±7          |
| Systolic pressure (mmHg)      | 139±5          | 140±2          |
| Diastolic pressure (mmHg)     | 106±4          | 104±2          |
| Mean arterial pressure (mmHg) | 121±3          | 120±2          |

Data are means±SE
